# Supplementary material for: Effect of adsorption kinetics on dissociation of DNA-nucleobases on gold nanoparticles under pulsed laser illumination
Source: Royal Society of Chemistry journal article supplement (doi:10.1039/c6cp08433h), 2017-01-01
Supplement: c6cp08433h1.pdf [file c6cp08433h1.pdf]

Electronic Supplementary Information

**Effect of Adsorption Kinetics on Dissociation of DNA-Nucleobases on Gold  
Nanoparticles under Pulsed Laser Illumination**

R. Schürmann<sup>a,b</sup> and I. Bald<sup>a,b\*</sup>

<sup>a</sup>*Institute of Chemistry, Physical Chemistry, University of Potsdam, Karl-Liebknecht-Str. 24-25, 14776  
Potsdam, Germany*

*\*Email: bald@uni-potsdam.de*

<sup>b</sup>*BAM Federal Institute for Materials Research and Testing, Richard-Willstätter-Str. 11, 12489 Berlin,  
Germany*

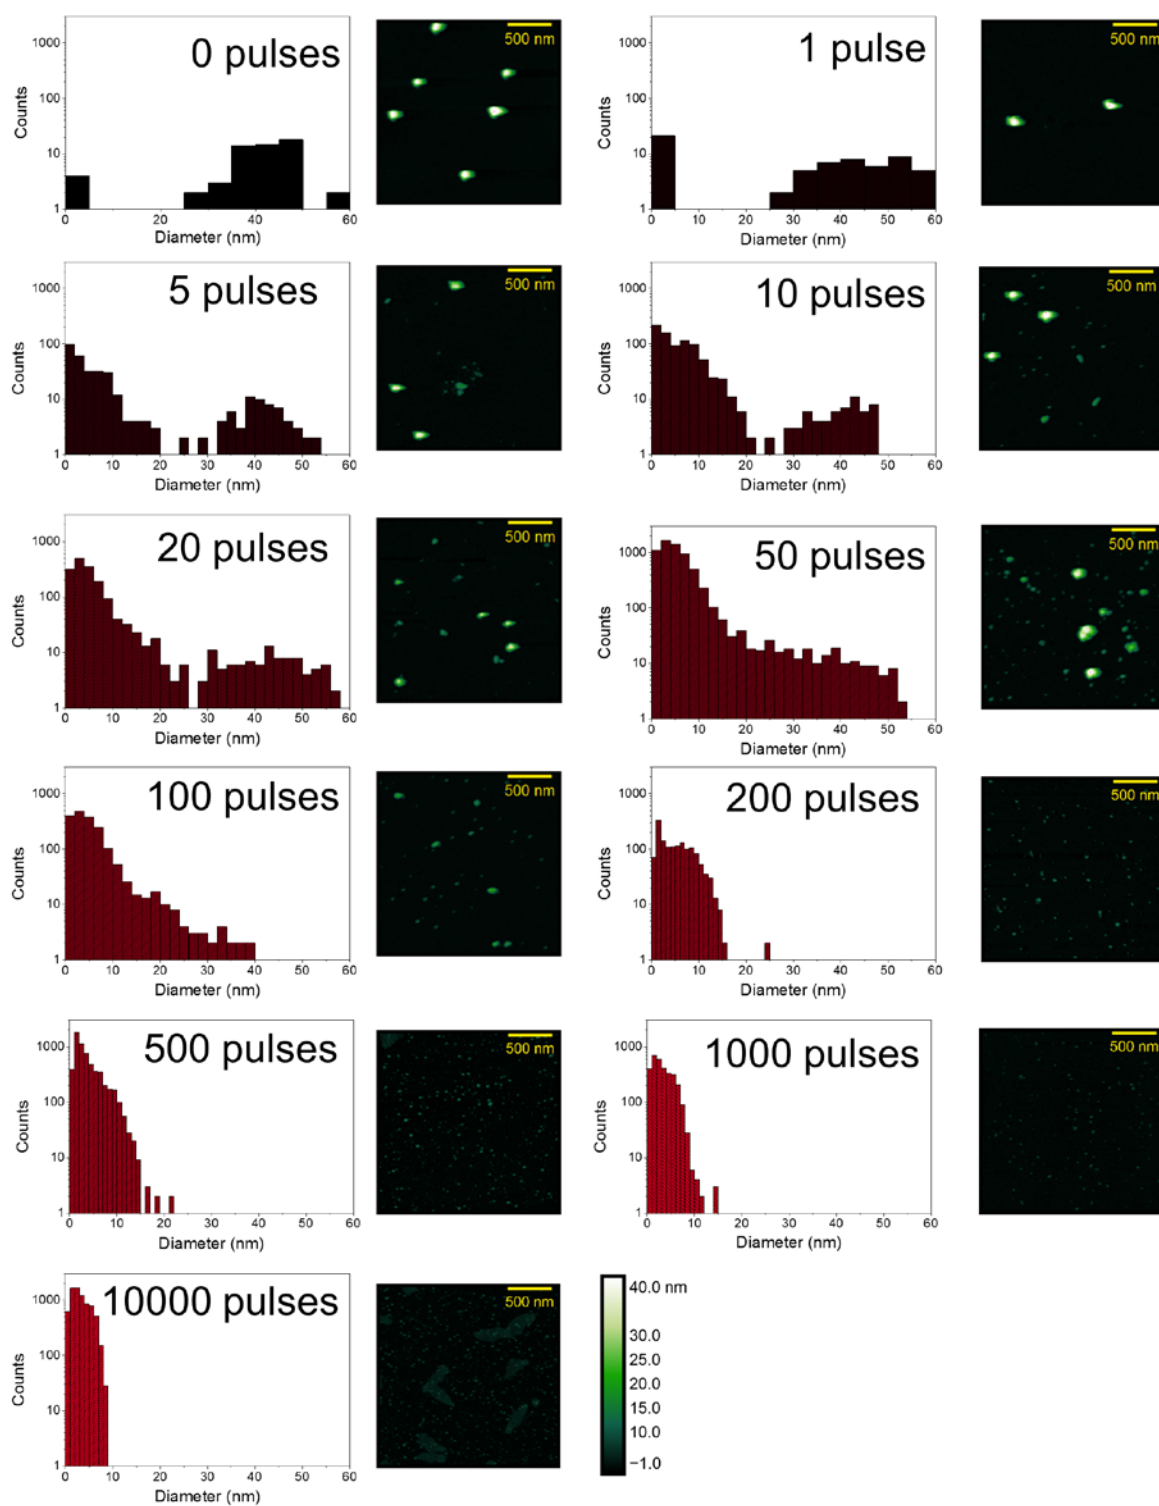

Figure S1: AFM images and size distribution of GNP with a nominal size of 40 nm dried on a Si-substrate after irradiation with a certain number of laser pulses.

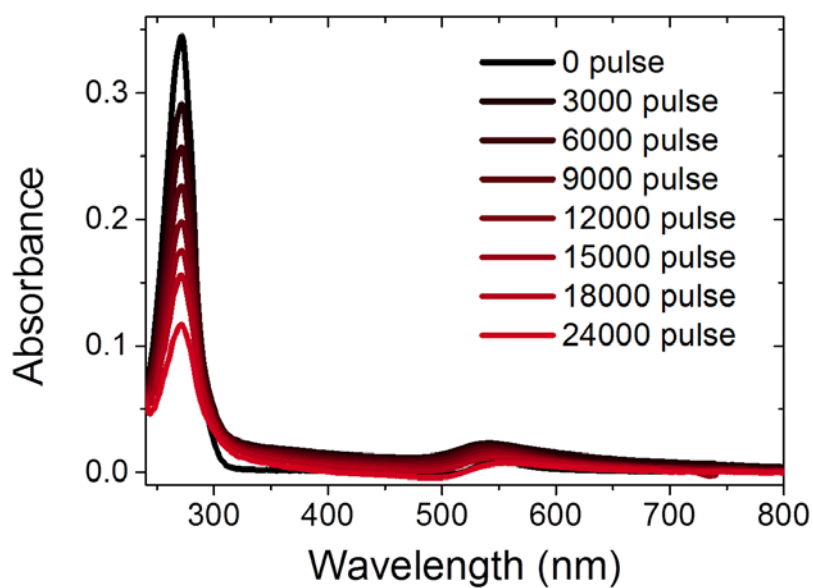

Figure S2: Absorbance spectra of irradiated  $^{88}\text{BrA}$  and GNP corrected by subtracting a spectrum of the pure GNPs irradiated under the same experimental conditions. The features for wavelengths above 300 nm are caused by the aggregation of the nanoparticles.

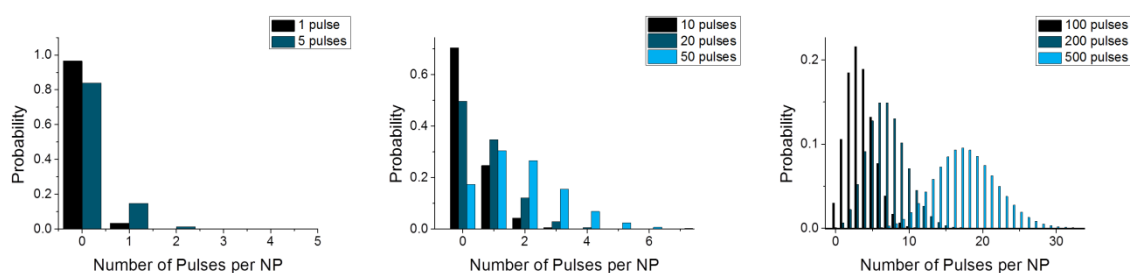

Figure S3: Poisson probability distribution of laser pulses that hit a GNP in the illuminated area.

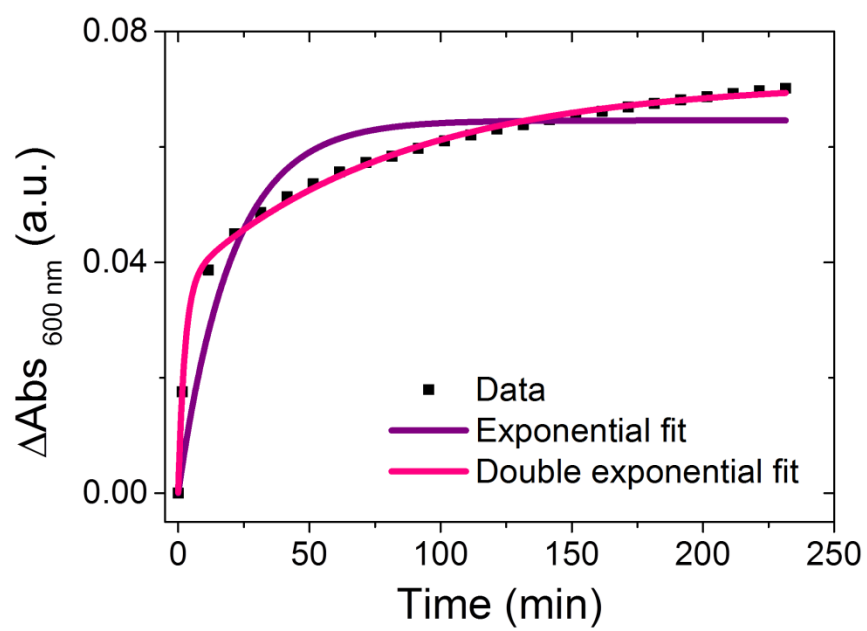

Figure S4: Increase of the Absorbance at 600 nm of irradiated GNP after the addition of 20  $\mu\text{M}$  Cytosine.
